# Supplementary material for: First Characterization of Ostreopsis cf. ovata (Dinophyceae) and Detection of Ovatoxins during a Multispecific and Toxic Ostreopsis Bloom on French Atlantic Coast
Source: MDPI journal article supplement (doi:10.3390/md20070461), 2022-07-18
Supplement: s1 [file s1]

**Table S1.** List of strains/sequences used in the phylogenetic analysis. Clones sharing a similar sequence are considered as the same ribotype.

| Strain / isolate ID | ribotype | Accession number | Origin                                      | Clade                            |
|---------------------|----------|------------------|---------------------------------------------|----------------------------------|
| S70830-4            |          | AB674907         | Japan : Susaki City, Kochi                  | <i>O. cf. ovata</i> (subclade A) |
| T70828-2            |          | AB674903         | Japan: Tei, Konan City, Kochi               | <i>O. cf. ovata</i> (subclade A) |
| OS-04BR             |          | FM244664         | Brazil: West Atlantic Ocean, Rio de Janeiro | <i>O. cf. ovata</i> (subclade A) |
| T60730-1            | 1        | AB674902         | Japan: Konan City, Kochi                    | <i>O. cf. ovata</i> (subclade A) |
| A1                  | 1        | AJ311520         | Italy: Gioia Tauro, Tyrrhenian Sea          | <i>O. cf. ovata</i> (subclade A) |
| IEO-02BR            | 1        | AJ318461         | Brazil                                      | <i>O. cf. ovata</i> (subclade A) |
| IEO-15BR            | 1        | AJ318462         | Brazil                                      | <i>O. cf. ovata</i> (subclade A) |
| IEO-01BR            | 1        | AJ420006         | Brazil                                      | <i>O. cf. ovata</i> (subclade A) |
| IEO-03BR            | 1        | AJ491311         | Brazil                                      | <i>O. cf. ovata</i> (subclade A) |
| IEO-06BR            | 1        | AJ491312         | Brazil                                      | <i>O. cf. ovata</i> (subclade A) |
| <b>IFR-OST-01E</b>  | <b>1</b> | <b>ON980637</b>  | <b>France: Saint-Jean-de-Luz</b>            | <i>O. cf. ovata</i> (subclade A) |
| <b>IFR21-331</b>    | <b>1</b> | <b>ON980577</b>  | <b>France: Saint-Jean-de-Luz</b>            | <i>O. cf. ovata</i> (subclade A) |
| <b>IFR21-334</b>    | <b>1</b> | <b>ON980578</b>  | <b>France: Saint-Jean-de-Luz</b>            | <i>O. cf. ovata</i> (subclade A) |
| <b>IFR21-335</b>    | <b>1</b> | <b>ON980579</b>  | <b>France: Saint-Jean-de-Luz</b>            | <i>O. cf. ovata</i> (subclade A) |
| <b>IFR21-336</b>    | <b>1</b> | <b>ON980580</b>  | <b>France: Saint-Jean-de-Luz</b>            | <i>O. cf. ovata</i> (subclade A) |
| <b>IFR21-338</b>    | <b>1</b> | <b>ON980581</b>  | <b>France: Saint-Jean-de-Luz</b>            | <i>O. cf. ovata</i> (subclade A) |
| <b>IFR21-339</b>    | <b>1</b> | <b>ON980582</b>  | <b>France: Saint-Jean-de-Luz</b>            | <i>O. cf. ovata</i> (subclade A) |
| <b>IFR21-340</b>    | <b>1</b> | <b>ON980583</b>  | <b>France: Saint-Jean-de-Luz</b>            | <i>O. cf. ovata</i> (subclade A) |
| <b>IFR22-003</b>    | <b>1</b> | <b>ON980584</b>  | <b>France: Saint-Jean-de-Luz</b>            | <i>O. cf. ovata</i> (subclade A) |
| <b>IFR22-004</b>    | <b>1</b> | <b>ON980585</b>  | <b>France: Saint-Jean-de-Luz</b>            | <i>O. cf. ovata</i> (subclade A) |
| <b>IFR22-005</b>    | <b>1</b> | <b>ON980586</b>  | <b>France: Saint-Jean-de-Luz</b>            | <i>O. cf. ovata</i> (subclade A) |
| <b>IFR22-006</b>    | <b>1</b> | <b>ON980587</b>  | <b>France: Saint-Jean-de-Luz</b>            | <i>O. cf. ovata</i> (subclade A) |
| <b>IFR22-007</b>    | <b>1</b> | <b>ON980588</b>  | <b>France: Saint-Jean-de-Luz</b>            | <i>O. cf. ovata</i> (subclade A) |
| <b>IFR22-009</b>    | <b>1</b> | <b>ON980589</b>  | <b>France: Saint-Jean-de-Luz</b>            | <i>O. cf. ovata</i> (subclade A) |
| <b>IFR22-010</b>    | <b>1</b> | <b>ON980590</b>  | <b>France: Saint-Jean-de-Luz</b>            | <i>O. cf. ovata</i> (subclade A) |
| <b>IFR22-012</b>    | <b>1</b> | <b>ON980591</b>  | <b>France: Saint-Jean-de-Luz</b>            | <i>O. cf. ovata</i> (subclade A) |
| <b>IFR22-013</b>    | <b>1</b> | <b>ON980592</b>  | <b>France: Saint-Jean-de-Luz</b>            | <i>O. cf. ovata</i> (subclade A) |
| <b>IFR22-015</b>    | <b>1</b> | <b>ON980593</b>  | <b>France: Saint-Jean-de-Luz</b>            | <i>O. cf. ovata</i> (subclade A) |
| <b>IFR22-016</b>    | <b>1</b> | <b>ON980594</b>  | <b>France: Saint-Jean-de-Luz</b>            | <i>O. cf. ovata</i> (subclade A) |
| <b>IFR22-018</b>    | <b>1</b> | <b>ON980595</b>  | <b>France: Saint-Jean-de-Luz</b>            | <i>O. cf. ovata</i> (subclade A) |
| <b>IFR22-020</b>    | <b>1</b> | <b>ON980596</b>  | <b>France: Saint-Jean-de-Luz</b>            | <i>O. cf. ovata</i> (subclade A) |
| <b>IFR22-022</b>    | <b>1</b> | <b>ON980597</b>  | <b>France: Saint-Jean-de-Luz</b>            | <i>O. cf. ovata</i> (subclade A) |
| <b>IFR22-023</b>    | <b>1</b> | <b>ON980598</b>  | <b>France: Saint-Jean-de-Luz</b>            | <i>O. cf. ovata</i> (subclade A) |
| <b>IFR22-028</b>    | <b>1</b> | <b>ON980599</b>  | <b>France: Saint-Jean-de-Luz</b>            | <i>O. cf. ovata</i> (subclade A) |
| <b>IFR22-032</b>    | <b>1</b> | <b>ON980600</b>  | <b>France: Saint-Jean-de-Luz</b>            | <i>O. cf. ovata</i> (subclade A) |
| <b>IFR22-033</b>    | <b>1</b> | <b>ON980601</b>  | <b>France: Saint-Jean-de-Luz</b>            | <i>O. cf. ovata</i> (subclade A) |
| <b>IFR22-038</b>    | <b>1</b> | <b>ON980602</b>  | <b>France: Saint-Jean-de-Luz</b>            | <i>O. cf. ovata</i> (subclade A) |
| <b>IFR22-040</b>    | <b>1</b> | <b>ON980603</b>  | <b>France: Saint-Jean-de-Luz</b>            | <i>O. cf. ovata</i> (subclade A) |
| <b>IFR22-043</b>    | <b>1</b> | <b>ON980604</b>  | <b>France: Saint-Jean-de-Luz</b>            | <i>O. cf. ovata</i> (subclade A) |
| <b>IFR22-045</b>    | <b>1</b> | <b>ON980605</b>  | <b>France: Saint-Jean-de-Luz</b>            | <i>O. cf. ovata</i> (subclade A) |
| <b>IFR22-049</b>    | <b>1</b> | <b>ON980606</b>  | <b>France: Saint-Jean-de-Luz</b>            | <i>O. cf. ovata</i> (subclade A) |
| <b>IFR22-050</b>    | <b>1</b> | <b>ON980607</b>  | <b>France: Saint-Jean-de-Luz</b>            | <i>O. cf. ovata</i> (subclade A) |
| <b>IFR22-051</b>    | <b>1</b> | <b>ON980608</b>  | <b>France: Saint-Jean-de-Luz</b>            | <i>O. cf. ovata</i> (subclade A) |
| <b>IFR22-055</b>    | <b>1</b> | <b>ON980609</b>  | <b>France: Saint-Jean-de-Luz</b>            | <i>O. cf. ovata</i> (subclade A) |
| <b>IFR22-057</b>    | <b>1</b> | <b>ON980610</b>  | <b>France: Saint-Jean-de-Luz</b>            | <i>O. cf. ovata</i> (subclade A) |
| <b>IFR22-058</b>    | <b>1</b> | <b>ON980611</b>  | <b>France: Saint-Jean-de-Luz</b>            | <i>O. cf. ovata</i> (subclade A) |
| <b>IFR22-060</b>    | <b>1</b> | <b>ON980612</b>  | <b>France: Saint-Jean-de-Luz</b>            | <i>O. cf. ovata</i> (subclade A) |
| <b>IFR22-064</b>    | <b>1</b> | <b>ON980613</b>  | <b>France: Saint-Jean-de-Luz</b>            | <i>O. cf. ovata</i> (subclade A) |
| <b>IFR22-065</b>    | <b>1</b> | <b>ON980614</b>  | <b>France: Saint-Jean-de-Luz</b>            | <i>O. cf. ovata</i> (subclade A) |
| <b>IFR22-067</b>    | <b>1</b> | <b>ON980615</b>  | <b>France: Saint-Jean-de-Luz</b>            | <i>O. cf. ovata</i> (subclade A) |
| <b>IFR22-070</b>    | <b>1</b> | <b>ON980616</b>  | <b>France: Saint-Jean-de-Luz</b>            | <i>O. cf. ovata</i> (subclade A) |

|               |   |          |                                             |                                  |
|---------------|---|----------|---------------------------------------------|----------------------------------|
| IFR22-072     | 1 | ON980617 | France: Saint-Jean-de-Luz                   | <i>O. cf. ovata</i> (subclade A) |
| IFR22-075     | 1 | ON980618 | France: Saint-Jean-de-Luz                   | <i>O. cf. ovata</i> (subclade A) |
| IFR22-079     | 1 | ON980619 | France: Saint-Jean-de-Luz                   | <i>O. cf. ovata</i> (subclade A) |
| IFR22-081     | 1 | ON980620 | France: Saint-Jean-de-Luz                   | <i>O. cf. ovata</i> (subclade A) |
| IFR-OST01V    | 1 | FJ905896 | France: Villefranche sur Mer                | <i>O. cf. ovata</i> (subclade A) |
| IFR-OST01M    | 1 | FJ905897 | France: Morgiret, Frioul Island, Marseilles | <i>O. cf. ovata</i> (subclade A) |
| Geo-2         | 1 | FM244627 | Italy:Mediterranean, Ligurian, Genova       | <i>O. cf. ovata</i> (subclade A) |
| CBA-N         | 1 | FM244631 | Italy:Tyrrenian Sea, S. Felice Circeo       | <i>O. cf. ovata</i> (subclade A) |
| VGO822        | 1 | FM244635 | Spain:Mediterranean, Catalan, Costa Brava   | <i>O. cf. ovata</i> (subclade A) |
|               |   |          | Spain:East Atlantic, Canary Island,         |                                  |
| VGO884        | 1 | FM244639 | Lanzarote                                   | <i>O. cf. ovata</i> (subclade A) |
|               |   |          | Spain:East Atlantic, Canary Island,         |                                  |
| VGO886        | 1 | FM244640 | Lanzarote                                   | <i>O. cf. ovata</i> (subclade A) |
|               |   |          | Spain:East Atlantic, Canary Island,         |                                  |
| VGO887        | 1 | FM244641 | Lanzarote                                   | <i>O. cf. ovata</i> (subclade A) |
| OS-05BR       | 1 | FM244665 | Brazil:West Atlantic Ocean, Rio de Janeiro  | <i>O. cf. ovata</i> (subclade A) |
| OS-07BR       | 1 | FM244666 | Brazil:West Atlantic Ocean, Rio de Janeiro  | <i>O. cf. ovata</i> (subclade A) |
| OS-10BR       | 1 | FM244667 | Brazil:West Atlantic Ocean, Rio de Janeiro  | <i>O. cf. ovata</i> (subclade A) |
| OS-13BR       | 1 | FM244668 | Brazil:West Atlantic Ocean, Rio de Janeiro  | <i>O. cf. ovata</i> (subclade A) |
| OS-16-BR      | 1 | FM244669 | Brazil:West Atlantic Ocean, Rio de Janeiro  | <i>O. cf. ovata</i> (subclade A) |
| OS-18BR       | 1 | FM244670 | Brazil:West Atlantic Ocean, Rio de Janeiro  | <i>O. cf. ovata</i> (subclade A) |
| OS-20BR       | 1 | FM244671 | Brazil:West Atlantic Ocean, Rio de Janeiro  | <i>O. cf. ovata</i> (subclade A) |
| KC70          | 1 | FM244734 | Greece:Mediterranean, Aegean, Athens        | <i>O. cf. ovata</i> (subclade A) |
| VGO964        | 1 | HG972965 | Spain:Llavaneres, Catalan Sea               | <i>O. cf. ovata</i> (subclade A) |
|               |   |          | Spain: East Atlantic, Canary Island,        |                                  |
| VGO10001      | 1 | JX065551 | Lanzarote                                   | <i>O. cf. ovata</i> (subclade A) |
| Dn145EHU      | 1 | JX987684 | Portugal: Lagos                             | <i>O. cf. ovata</i> (subclade A) |
| Dn146EHU      | 1 | JX987685 | Portugal: Lagos                             | <i>O. cf. ovata</i> (subclade A) |
| Dn147EHU      | 1 | JX987686 | Portugal: Lagos                             | <i>O. cf. ovata</i> (subclade A) |
| Dn148EHU      | 1 | JX987687 | Portugal: Lagos                             | <i>O. cf. ovata</i> (subclade A) |
| Oso.1         | 1 | KJ781415 | Portugal: Lagos                             | <i>O. cf. ovata</i> (subclade A) |
| –             | 1 | KX781270 | Brazil: Sao Paulo, Ubatuba                  | <i>O. cf. ovata</i> (subclade A) |
| IRTA-SMM15-13 | 1 | MG551865 | Spain: Fangar Bay                           | <i>O. cf. ovata</i> (subclade A) |
|               |   |          | Brazil: Rio de Janeiro, Armacao dos         |                                  |
| UNR-05        | 1 | MN560106 | Buzios, Praia do Forno                      | <i>O. cf. ovata</i> (subclade A) |
| UNR-60        | 1 | MN560108 | Brazil: Pernambuco, Fernando de Noronha     | <i>O. cf. ovata</i> (subclade A) |
| VGO820        |   | FM244634 | Spain:Mediterranean, Catalan, Costa Brava   | <i>O. cf. ovata</i> (subclade A) |
| 10BD          | 2 | KF612633 | Portugal: Atlantic coast in Camilo, Algarve | <i>O. cf. ovata</i> (subclade A) |
| 10BA          | 2 | KF612635 | Portugal: Atlantic coast in Camilo, Algarve | <i>O. cf. ovata</i> (subclade A) |
| UFBA013       |   | KY628450 | Brazil                                      | <i>O. cf. ovata</i> (subclade A) |
| LCA-E7        |   | JF682767 | Brazil                                      | <i>O. cf. ovata</i> (subclade A) |
|               |   |          | Spain:East Atlantic, Canary Island,         |                                  |
| VGO883        |   | FM244638 | Lanzarote                                   | <i>O. cf. ovata</i> (subclade A) |
|               |   |          | Portugal:East Atlantic, Madeira, Bahia de   |                                  |
| VGO614        |   | FM244642 | Abra                                        | <i>O. cf. ovata</i> (subclade B) |
|               |   |          | Greece:Mediterranean, N Aegean, Limnos      |                                  |
| KC17          | 3 | FM244736 | Island                                      | <i>O. cf. ovata</i> (subclade B) |
|               |   |          | Brazil: Rio Grande do Norte, Tibau do Sul,  |                                  |
| UNR-10        | 3 | MN560107 | Praia de Pipa                               | <i>O. cf. ovata</i> (subclade B) |
| HER27         |   | KX055881 | Australia : Heron Reef (Queensland)         | <i>O. cf. ovata</i> (subclade C) |
| VNNT038       |   | MT968505 | Viet Nam                                    | <i>O. cf. ovata</i> (subclade C) |
| TF4OS         |   | AB841250 | Thailand:Trat, Koh Wai                      | <i>O. cf. ovata</i> (subclade C) |
| TF5OS         |   | AB841251 | Thailand:Trat, Koh Wai                      | <i>O. cf. ovata</i> (subclade C) |
| OVPT2         | 4 | AB674905 | Malaysia                                    | <i>O. cf. ovata</i> (subclade C) |
| OvSA10        | 4 | AF218464 | Malaysia: Kota Kinabalu                     | <i>O. cf. ovata</i> (subclade C) |
| 1S1D2         | 4 | KX129869 | China                                       | <i>O. cf. ovata</i> (subclade C) |
| 1S1D4         | 4 | KX129870 | China                                       | <i>O. cf. ovata</i> (subclade C) |
| 1S1D6         | 4 | KX129871 | China                                       | <i>O. cf. ovata</i> (subclade C) |

|              |    |          |                                            |                                  |
|--------------|----|----------|--------------------------------------------|----------------------------------|
| OvSA02       |    | AF218460 | Malaysia: Kota Kinabalu                    | <i>O. cf. ovata</i> (subclade C) |
| P-0117       |    | KM032202 | France: Reunion Island, W Indian Ocean     | <i>O. cf. ovata</i> (subclade C) |
| OvPR01       | 5  | AF218457 | Malaysia: Pulau Redang                     | <i>O. cf. ovata</i> (subclade C) |
| OvPR04       | 5  | AF218458 | Malaysia: Pulau Redang                     | <i>O. cf. ovata</i> (subclade C) |
| CAWD174      |    | AB674904 | Japan: Kubazaki, Kohama island             | <i>O. cf. ovata</i> (subclade C) |
| OvSA06       |    | AF218463 | Malaysia: Kota Kinabalu                    | <i>O. cf. ovata</i> (subclade C) |
| T145         | 6  | AB841232 | Thailand:Rayong, Koh Man                   | <i>O. cf. ovata</i> (subclade D) |
| T152         | 6  | AB841235 | Thailand:Rayong, Koh Man                   | <i>O. cf. ovata</i> (subclade D) |
| T153         | 6  | AB841236 | Thailand:Rayong, Koh Man                   | <i>O. cf. ovata</i> (subclade D) |
| T163         | 6  | AB841237 | Thailand:Rayong, Koh Man                   | <i>O. cf. ovata</i> (subclade D) |
| T170         | 6  | AB841238 | Thailand:Rayong, Koh Man                   | <i>O. cf. ovata</i> (subclade D) |
| T197         | 6  | AB841245 | Thailand:Rayong, Koh Man                   | <i>O. cf. ovata</i> (subclade D) |
| T198         | 6  | AB841246 | Thailand:Rayong, Koh Man                   | <i>O. cf. ovata</i> (subclade D) |
| T207         | 6  | AB841248 | Thailand:Rayong, Koh Man                   | <i>O. cf. ovata</i> (subclade D) |
| VNGR009      | 6  | MT968503 | Viet Nam                                   | <i>O. cf. ovata</i> (subclade D) |
| VNGR011      | 6  | MT968504 | Viet Nam                                   | <i>O. cf. ovata</i> (subclade D) |
| VNGR001      |    | MT968502 | Viet Nam                                   | <i>O. cf. ovata</i> (subclade D) |
| T193         |    | AB841241 | Thailand:Rayong, Koh Man                   | <i>O. cf. ovata</i> (subclade D) |
| CBA-9        |    | FM244726 | Indonesia:East Pacific, North Sulawesi     | <i>O. cf. ovata</i> (subclade E) |
| CBA-4        | 7  | FM244724 | Indonesia:East Pacific, North Sulawesi     | <i>O. cf. ovata</i> (subclade E) |
| CBA-6        | 7  | FM244725 | Indonesia:East Pacific, North Sulawesi     | <i>O. cf. ovata</i> (subclade E) |
| CBA-10       | 7  | FM244727 | Indonesia:East Pacific, North Sulawesi     | <i>O. cf. ovata</i> (subclade E) |
| OvPD06       | 8  | AF218455 | Malaysia: Port Dickson                     | <i>O. cf. ovata</i> (subclade E) |
| OvPD07       | 8  | AF218456 | Malaysia: Port Dickson                     | <i>O. cf. ovata</i> (subclade E) |
| OvPD04       |    | AF076217 | Malaysia: Port Dickson                     | <i>O. cf. ovata</i> (subclade E) |
| 1G           |    | MH844087 | Ecuador: Galapagos                         | <i>O. cf. ovata</i> (subclade E) |
| CB-2013      |    | JX065586 | Belize: Caribbean Sea                      | <i>O. cf. ovata</i> (subclade E) |
| T70828-5     |    | AB674908 | Japan: Tei, Konan City, Kochi              | <i>Ostreopsis</i> sp. 1          |
| MB61007-3    |    | AB674909 | Japan: Bishagoiwa, Muroto City, Kochi      | <i>Ostreopsis</i> sp. 1          |
| s0617        |    | AB674910 | Japan: Misaki cho, Nagasaki city, Nagasaki | <i>Ostreopsis</i> sp. 1          |
| OdoOst6      |    | AB674913 | Japan: Odo, Itoman, Okinawa                | <i>Ostreopsis</i> sp. 2          |
| BH9          |    | MN418266 | Australia                                  | <i>Ostreopsis</i> sp. 9          |
| BH1          |    | MN418258 | Australia                                  | <i>Ostreopsis</i> sp. 9          |
| MW2          | 9  | MN418249 | Australia                                  | <i>Ostreopsis</i> sp. 9          |
| MW3          | 9  | MN418250 | Australia                                  | <i>Ostreopsis</i> sp. 9          |
| MW7          | 9  | MN418254 | Australia                                  | <i>Ostreopsis</i> sp. 9          |
| MW8          | 10 | MN418255 | Australia                                  | <i>Ostreopsis</i> sp. 9          |
| MW9          | 10 | MN418256 | Australia                                  | <i>Ostreopsis</i> sp. 9          |
| MW10         | 10 | MN418257 | Australia                                  | <i>Ostreopsis</i> sp. 9          |
| BH3          | 10 | MN418260 | Australia                                  | <i>Ostreopsis</i> sp. 9          |
| IFR-OSTS-C9  | 11 | MT952066 | Spain/France                               | <i>Ostreopsis</i> sp. 9          |
| IFR-OSTS-C10 | 11 | MT952067 | Spain/France                               | <i>Ostreopsis</i> sp. 9          |
| IFR-OSTS-D3  | 11 | MT952020 | Spain/France                               | <i>Ostreopsis</i> sp. 9          |
| IFR-OSTS-D8  | 11 | MT952025 | Spain/France                               | <i>Ostreopsis</i> sp. 9          |
| IFR-OSTS-D12 | 11 | MT952029 | Spain/France                               | <i>Ostreopsis</i> sp. 9          |
| IFR-OSTS-H3  | 11 | MT952039 | Spain/France                               | <i>Ostreopsis</i> sp. 9          |
| IFR-OSTS-H4  | 11 | MT952040 | Spain/France                               | <i>Ostreopsis</i> sp. 9          |
| IFR-OSTS-H8  | 11 | MT952044 | Spain/France                               | <i>Ostreopsis</i> sp. 9          |
| IFR-OSTS-H10 | 11 | MT952046 | Spain/France                               | <i>Ostreopsis</i> sp. 9          |
| IFR-OSTS-H13 | 11 | MT952049 | Spain/France                               | <i>Ostreopsis</i> sp. 9          |
| IFR-OSTS-SB1 | 11 | MT952006 | Spain/France                               | <i>Ostreopsis</i> sp. 9          |
| IFR-OSTS-SB5 | 11 | MT952009 | Spain/France                               | <i>Ostreopsis</i> sp. 9          |
| IFR-OSTS-SC5 | 11 | MT952012 | Spain/France                               | <i>Ostreopsis</i> sp. 9          |
| IFR-OSTS-SD6 | 11 | MT952018 | Spain/France                               | <i>Ostreopsis</i> sp. 9          |
| IFR-OSTS-SD5 |    | MT952017 | Spain/France                               | <i>Ostreopsis</i> sp. 9          |
| IFR-OSTS-D4  | 12 | MT952021 | Spain/France                               | <i>Ostreopsis</i> sp. 9          |

|               |    |          |                 |                         |
|---------------|----|----------|-----------------|-------------------------|
| IFR-OSTS-D7   | 12 | MT952024 | Spain/France    | <i>Ostreopsis</i> sp. 9 |
| IFR-OSTS-D10  | 12 | MT952027 | Spain/France    | <i>Ostreopsis</i> sp. 9 |
| IFR-OSTS-D11  | 12 | MT952028 | Spain/France    | <i>Ostreopsis</i> sp. 9 |
| IFR-OSTS-H2   | 12 | MT952038 | Spain/France    | <i>Ostreopsis</i> sp. 9 |
| IFR-OSTS-H5   | 12 | MT952041 | Spain/France    | <i>Ostreopsis</i> sp. 9 |
| IFR-OSTS-H6   | 12 | MT952042 | Spain/France    | <i>Ostreopsis</i> sp. 9 |
| IFR-OSTS-H7   | 12 | MT952043 | Spain/France    | <i>Ostreopsis</i> sp. 9 |
| IFR-OSTS-SD4  | 12 | MT952016 | Spain/France    | <i>Ostreopsis</i> sp. 9 |
| IFR-OSTS-C3   | 13 | MT952060 | Spain/France    | <i>Ostreopsis</i> sp. 9 |
| IFR-OSTS-D3   | 13 | MT952015 | Spain/France    | <i>Ostreopsis</i> sp. 9 |
| IFR-OSTS-SB4  |    | MT952008 | Spain/France    | <i>Ostreopsis</i> sp. 9 |
| IFR-OSTS-SC2  | 14 | MT952014 | Spain/France    | <i>Ostreopsis</i> sp. 9 |
| IFR-OSTS-SD2  | 14 | MT952011 | Spain/France    | <i>Ostreopsis</i> sp. 9 |
| IFR-OSTS-D9   | 15 | MT952026 | Spain/France    | <i>Ostreopsis</i> sp. 9 |
| IFR-OSTS-D15  | 15 | MT952032 | Spain/France    | <i>Ostreopsis</i> sp. 9 |
| IFR-OSTS-LA4  | 15 | MT952035 | Spain/France    | <i>Ostreopsis</i> sp. 9 |
| IFR-OSTS-Z1   | 15 | MT952050 | Spain/France    | <i>Ostreopsis</i> sp. 9 |
| IFR-OSTS-Z3   | 15 | MT952052 | Spain/France    | <i>Ostreopsis</i> sp. 9 |
| IFR-OSTS-Z7   | 15 | MT952056 | Spain/France    | <i>Ostreopsis</i> sp. 9 |
| IFR-OSTS-OS3E | 16 | MT952070 | Spain/France    | <i>Ostreopsis</i> sp. 9 |
| IFR-OSTS-MC3  | 16 | MT952069 | Spain/France    | <i>Ostreopsis</i> sp. 9 |
| IFR-OSTS-C2   | 16 | MT952059 | Spain/France    | <i>Ostreopsis</i> sp. 9 |
| IFR-OSTS-C1   | 16 | MT952058 | Spain/France    | <i>Ostreopsis</i> sp. 9 |
| IFR-OSTS-Z6   | 16 | MT952055 | Spain/France    | <i>Ostreopsis</i> sp. 9 |
| IFR-OSTS-Z4   | 16 | MT952053 | Spain/France    | <i>Ostreopsis</i> sp. 9 |
| IFR-OSTS-Z2   | 16 | MT952051 | Spain/France    | <i>Ostreopsis</i> sp. 9 |
| IFR-OSTS-H12  | 16 | MT952048 | Spain/France    | <i>Ostreopsis</i> sp. 9 |
| IFR-OSTS-H1   | 16 | MT952037 | Spain/France    | <i>Ostreopsis</i> sp. 9 |
| IFR-OSTS-LD3  | 16 | MT952036 | Spain/France    | <i>Ostreopsis</i> sp. 9 |
| IFR-OSTS-D17  | 16 | MT952034 | Spain/France    | <i>Ostreopsis</i> sp. 9 |
| IFR-OSTS-D14  | 16 | MT952031 | Spain/France    | <i>Ostreopsis</i> sp. 9 |
| IFR-OSTS-D13  | 16 | MT952030 | Spain/France    | <i>Ostreopsis</i> sp. 9 |
| IFR-OSTS-D5   | 16 | MT952022 | Spain/France    | <i>Ostreopsis</i> sp. 9 |
| IFR-OSTS-D2   | 16 | MT952019 | Spain/France    | <i>Ostreopsis</i> sp. 9 |
| IFR-OSTS-SC1  | 16 | MT952010 | Spain/France    | <i>Ostreopsis</i> sp. 9 |
| IFR-OSTS-SC6  | 16 | MT952013 | Spain/France    | <i>Ostreopsis</i> sp. 9 |
| IFR-OSTS-SB3  | 16 | MT952007 | Spain/France    | <i>Ostreopsis</i> sp. 9 |
| IFR-OSTS-C6   | 16 | MT952063 | Spain/France    | <i>Ostreopsis</i> sp. 9 |
| IFR-OSTS-Z5   | 16 | MT952054 | Spain/France    | <i>Ostreopsis</i> sp. 9 |
| IFR-OSTS-C11  | 16 | MT952068 | Spain/France    | <i>Ostreopsis</i> sp. 9 |
| IFR-OSTS-C8   | 16 | MT952065 | Spain/France    | <i>Ostreopsis</i> sp. 9 |
| IFR-OSTS-C5   | 16 | MT952062 | Spain/France    | <i>Ostreopsis</i> sp. 9 |
| IFR-OSTS-C4   | 16 | MT952061 | Spain/France    | <i>Ostreopsis</i> sp. 9 |
| IFR-OSTS-D16  | 16 | MT952033 | Spain/France    | <i>Ostreopsis</i> sp. 9 |
| IFR-OSTS-H9   | 16 | MT952045 | Spain/France    | <i>Ostreopsis</i> sp. 9 |
| IFR-OSTS-C7   | 16 | MT952064 | Spain/France    | <i>Ostreopsis</i> sp. 9 |
| IFR-OSTS-D6   |    | MT952023 | Spain/France    | <i>Ostreopsis</i> sp. 9 |
| GB23          |    | MN418303 | Australia       | <i>Ostreopsis</i> sp. 9 |
| Dn86EHU       |    | JX987675 | Portugal: Galea | <i>Ostreopsis</i> sp. 9 |
| KM2           |    | MN418305 | Australia       | <i>Ostreopsis</i> sp. 9 |
| BH8           |    | MN418265 | Australia       | <i>Ostreopsis</i> sp. 9 |
| KM4           | 17 | MN418307 | Australia       | <i>Ostreopsis</i> sp. 9 |
| KM7           | 17 | MN418310 | Australia       | <i>Ostreopsis</i> sp. 9 |
| KM8           | 17 | MN418311 | Australia       | <i>Ostreopsis</i> sp. 9 |
| KM5           | 18 | MN418308 | Australia       | <i>Ostreopsis</i> sp. 9 |
| KM6           | 18 | MN418309 | Australia       | <i>Ostreopsis</i> sp. 9 |

|                    |           |                 |                                  |                         |
|--------------------|-----------|-----------------|----------------------------------|-------------------------|
| MW4                | 19        | MN418251        | Australia                        | <i>Ostreopsis</i> sp. 9 |
| MW5                | 19        | MN418252        | Australia                        | <i>Ostreopsis</i> sp. 9 |
| MW6                | 19        | MN418253        | Australia                        | <i>Ostreopsis</i> sp. 9 |
| PC11               |           | MN418294        | Australia                        | <i>Ostreopsis</i> sp. 9 |
| Dn101EHU           |           | JX987679        | Portugal: Galea                  | <i>Ostreopsis</i> sp. 9 |
| KM1                |           | MN418304        | Australia                        | <i>Ostreopsis</i> sp. 9 |
| 143EHU             |           | JX987682        | Spain: San Sebastian             | <i>Ostreopsis</i> sp. 9 |
| PC7                | 20        | MN418290        | Australia                        | <i>Ostreopsis</i> sp. 9 |
| PC8                | 20        | MN418291        | Australia                        | <i>Ostreopsis</i> sp. 9 |
| PC9                | 20        | MN418292        | Australia                        | <i>Ostreopsis</i> sp. 9 |
| PC10               | 20        | MN418293        | Australia                        | <i>Ostreopsis</i> sp. 9 |
| PC13               | 20        | MN418295        | Australia                        | <i>Ostreopsis</i> sp. 9 |
| LM8                | 20        | MN418285        | Australia                        | <i>Ostreopsis</i> sp. 9 |
| LM9                | 20        | MN418286        | Australia                        | <i>Ostreopsis</i> sp. 9 |
| LM10               | 20        | MN418287        | Australia                        | <i>Ostreopsis</i> sp. 9 |
| MER14              | 20        | MN418312        | Australia                        | <i>Ostreopsis</i> sp. 9 |
| MER19              | 20        | MN418313        | Australia                        | <i>Ostreopsis</i> sp. 9 |
| CAWD96             | 20        | AB674915        | New Zealand: Kerikeri            | <i>Ostreopsis</i> sp. 9 |
| CAWD203            | 20        | KT868527        | Australia: Tasman Sea, Merimbula | <i>Ostreopsis</i> sp. 9 |
| MW1                |           | MN418248        | Australia                        | <i>Ostreopsis</i> sp. 9 |
| BH4                |           | MN418261        | Australia                        | <i>Ostreopsis</i> sp. 9 |
| PC3                |           | MN418288        | Australia                        | <i>Ostreopsis</i> sp. 9 |
| GB5                | 21        | MN418298        | Australia                        | <i>Ostreopsis</i> sp. 9 |
| GB8                | 21        | MN418299        | Australia                        | <i>Ostreopsis</i> sp. 9 |
| <b>IFR-OST-02E</b> | <b>22</b> | <b>ON980638</b> | <b>France: Saint-Jean-de-Luz</b> | <i>Ostreopsis</i> sp. 9 |
| <b>IFR-OST-03E</b> | <b>22</b> | <b>ON980639</b> | <b>France: Saint-Jean-de-Luz</b> | <i>Ostreopsis</i> sp. 9 |
| <b>IFR21-332</b>   | <b>22</b> | <b>ON980621</b> | <b>France: Saint-Jean-de-Luz</b> | <i>Ostreopsis</i> sp. 9 |
| <b>IFR21-333</b>   | <b>22</b> | <b>ON980622</b> | <b>France: Saint-Jean-de-Luz</b> | <i>Ostreopsis</i> sp. 9 |
| <b>IFR21-337</b>   | <b>22</b> | <b>ON980623</b> | <b>France: Saint-Jean-de-Luz</b> | <i>Ostreopsis</i> sp. 9 |
| <b>IFR22-008</b>   | <b>22</b> | <b>ON980624</b> | <b>France: Saint-Jean-de-Luz</b> | <i>Ostreopsis</i> sp. 9 |
| <b>IFR22-014</b>   | <b>22</b> | <b>ON980625</b> | <b>France: Saint-Jean-de-Luz</b> | <i>Ostreopsis</i> sp. 9 |
| <b>IFR22-017</b>   | <b>22</b> | <b>ON980626</b> | <b>France: Saint-Jean-de-Luz</b> | <i>Ostreopsis</i> sp. 9 |
| <b>IFR22-021</b>   | <b>22</b> | <b>ON980627</b> | <b>France: Saint-Jean-de-Luz</b> | <i>Ostreopsis</i> sp. 9 |
| <b>IFR22-024</b>   | <b>22</b> | <b>ON980628</b> | <b>France: Saint-Jean-de-Luz</b> | <i>Ostreopsis</i> sp. 9 |
| <b>IFR22-030</b>   | <b>22</b> | <b>ON980629</b> | <b>France: Saint-Jean-de-Luz</b> | <i>Ostreopsis</i> sp. 9 |
| <b>IFR22-034</b>   | <b>22</b> | <b>ON980630</b> | <b>France: Saint-Jean-de-Luz</b> | <i>Ostreopsis</i> sp. 9 |
| <b>IFR22-037</b>   | <b>22</b> | <b>ON980631</b> | <b>France: Saint-Jean-de-Luz</b> | <i>Ostreopsis</i> sp. 9 |
| <b>IFR22-041</b>   | <b>22</b> | <b>ON980632</b> | <b>France: Saint-Jean-de-Luz</b> | <i>Ostreopsis</i> sp. 9 |
| <b>IFR22-046</b>   | <b>22</b> | <b>ON980633</b> | <b>France: Saint-Jean-de-Luz</b> | <i>Ostreopsis</i> sp. 9 |
| <b>IFR22-056</b>   | <b>22</b> | <b>ON980634</b> | <b>France: Saint-Jean-de-Luz</b> | <i>Ostreopsis</i> sp. 9 |
| <b>IFR22-066</b>   | <b>22</b> | <b>ON980635</b> | <b>France: Saint-Jean-de-Luz</b> | <i>Ostreopsis</i> sp. 9 |
| <b>IFR22-073</b>   | <b>22</b> | <b>ON980636</b> | <b>France: Saint-Jean-de-Luz</b> | <i>Ostreopsis</i> sp. 9 |
| PC4                | 22        | MN418289        | Australia                        | <i>Ostreopsis</i> sp. 9 |
| GB15               | 22        | MN418301        | Australia                        | <i>Ostreopsis</i> sp. 9 |
| GB16               | 22        | MN418302        | Australia                        | <i>Ostreopsis</i> sp. 9 |
| MER24              | 22        | MN418315        | Australia                        | <i>Ostreopsis</i> sp. 9 |
| GB14               | 22        | MN418300        | Australia                        | <i>Ostreopsis</i> sp. 9 |
| Dn144EHU           | 22        | JX987683        | Spain: San Sebastian             | <i>Ostreopsis</i> sp. 9 |
| 142EHU             | 22        | JX987681        | Spain: San Sebastian             | <i>Ostreopsis</i> sp. 9 |
| GB3                | 22        | MN418297        | Australia                        | <i>Ostreopsis</i> sp. 9 |
| Dn91EHU            | 22        | JX987676        | Portugal: Lagos                  | <i>Ostreopsis</i> sp. 9 |
| Dn201EHU           | 22        | JX987699        | France: Saint Jean de Luz        | <i>Ostreopsis</i> sp. 9 |
| Dn188EHU           | 22        | JX987692        | Spain: Santona                   | <i>Ostreopsis</i> sp. 9 |
| Dn93EHU            | 22        | JX987678        | Portugal: Cascais                | <i>Ostreopsis</i> sp. 9 |
| Dn160EHU           | 22        | JX987689        | Spain: Santona                   | <i>Ostreopsis</i> sp. 9 |
| Dn158EHU           | 22        | JX987688        | Spain: Zierbana                  | <i>Ostreopsis</i> sp. 9 |

|              |    |          |                                               |                         |
|--------------|----|----------|-----------------------------------------------|-------------------------|
| Dn192EHU     | 22 | JX987696 | Spain: Zierbana                               | <i>Ostreopsis</i> sp. 9 |
| Dn171EHU     | 22 | JX987690 | France: Saint Jean de Luz                     | <i>Ostreopsis</i> sp. 9 |
| Dn172EHU     | 22 | JX987691 | France: Saint Jean de Luz                     | <i>Ostreopsis</i> sp. 9 |
| Dn189EHU     | 22 | JX987693 | Spain: San Sebastian                          | <i>Ostreopsis</i> sp. 9 |
| Dn190EHU     | 22 | JX987694 | Spain: San Sebastian                          | <i>Ostreopsis</i> sp. 9 |
| Dn191EHU     | 22 | JX987695 | Spain: San Sebastian                          | <i>Ostreopsis</i> sp. 9 |
| Dn92EHU      | 22 | JX987677 | Portugal: Galea                               | <i>Ostreopsis</i> sp. 9 |
| Dn196EHU     | 22 | JX987697 | Portugal: Galea                               | <i>Ostreopsis</i> sp. 9 |
| MER20        | 22 | MN418314 | Australia                                     | <i>Ostreopsis</i> sp. 9 |
| CNR-T5       | 22 | FM244729 | Italy:Mediterranean, Ionian Sea, Taormina     | <i>Ostreopsis</i> sp. 9 |
| CNR-B4       | 22 | AJ301643 | Italy:Ganzirri, Tyrrhenian Sea                | <i>Ostreopsis</i> sp. 9 |
| CSIC-D5      | 22 | AJ312944 | Spain:Catalon Coast                           | <i>Ostreopsis</i> sp. 9 |
| IEO-1V       | 22 | AJ319871 | Spain:Almeria,Andalusia                       | <i>Ostreopsis</i> sp. 9 |
| IEO-2V       | 22 | AJ491313 | Spain:Almeria, Andalusia                      | <i>Ostreopsis</i> sp. 9 |
| IEO-3V       | 22 | AJ491332 | Spain:Andalusia, Almeria                      | <i>Ostreopsis</i> sp. 9 |
| GB2          | 22 | MN418296 | Australia                                     | <i>Ostreopsis</i> sp. 9 |
| CNR-B5       | 22 | AJ491335 | Italy:Sicily, Tyrrehenian Sea, Ganzirri       | <i>Ostreopsis</i> sp. 9 |
| CSIC-D1      | 22 | AJ491333 | Spain:Catalan coast, La Fosca                 | <i>Ostreopsis</i> sp. 9 |
| CSIC-D7      | 22 | AJ491334 | Spain:Catalan Coast, La Fosca                 | <i>Ostreopsis</i> sp. 9 |
| Dn199EHU     | 22 | JX987698 | Portugal: Galea                               | <i>Ostreopsis</i> sp. 9 |
| IFR-OSTS-H11 | 22 | MT952047 | Spain/France                                  | <i>Ostreopsis</i> sp. 9 |
| LM7          | 23 | MN418284 | Australia                                     | <i>Ostreopsis</i> sp. 9 |
| KM3          | 23 | MN418306 | Australia                                     | <i>Ostreopsis</i> sp. 9 |
| LM1          | 24 | MN418278 | Australia                                     | <i>Ostreopsis</i> sp. 9 |
| LM2          | 24 | MN418279 | Australia                                     | <i>Ostreopsis</i> sp. 9 |
| LM3          | 24 | MN418280 | Australia                                     | <i>Ostreopsis</i> sp. 9 |
| LM4          | 24 | MN418281 | Australia                                     | <i>Ostreopsis</i> sp. 9 |
| LM5          | 24 | MN418282 | Australia                                     | <i>Ostreopsis</i> sp. 9 |
| LM6          | 24 | MN418283 | Australia                                     | <i>Ostreopsis</i> sp. 9 |
| FR4          |    | MN418271 | Australia                                     | <i>Ostreopsis</i> sp. 9 |
| BH2          | 25 | MN418259 | Australia                                     | <i>Ostreopsis</i> sp. 9 |
| BH6          | 25 | MN418263 | Australia                                     | <i>Ostreopsis</i> sp. 9 |
| BH7          | 25 | MN418264 | Australia                                     | <i>Ostreopsis</i> sp. 9 |
| BH10         | 25 | MN418267 | Australia                                     | <i>Ostreopsis</i> sp. 9 |
| FR1          | 25 | MN418268 | Australia                                     | <i>Ostreopsis</i> sp. 9 |
| FR2          | 25 | MN418269 | Australia                                     | <i>Ostreopsis</i> sp. 9 |
| FR3          | 25 | MN418270 | Australia                                     | <i>Ostreopsis</i> sp. 9 |
| FR5          | 25 | MN418272 | Australia                                     | <i>Ostreopsis</i> sp. 9 |
| FR6          | 25 | MN418273 | Australia                                     | <i>Ostreopsis</i> sp. 9 |
| FR9          | 25 | MN418276 | Australia                                     | <i>Ostreopsis</i> sp. 9 |
| FR10         | 25 | MN418277 | Australia                                     | <i>Ostreopsis</i> sp. 9 |
| FR7          | 26 | MN418274 | Australia                                     | <i>Ostreopsis</i> sp. 9 |
| FR8          | 26 | MN418275 | Australia                                     | <i>Ostreopsis</i> sp. 9 |
| BH5          |    | MN418262 | Australia                                     | <i>Ostreopsis</i> sp. 9 |
| HER21        |    | KX055875 | Australia : Heron Reef (Queensland)           | <i>O. rhodesiae</i>     |
| HER20        |    | KX055876 | Australia : Heron Reef (Queensland)           | <i>O. rhodesiae</i>     |
| HER25        |    | KX055874 | Australia : Heron Reef (Queensland)           | <i>O. rhodesiae</i>     |
| P-0135       |    | KM032215 | France: Reunion Island, W Indian Ocean        | <i>Ostreopsis</i> sp. 8 |
| P-0121       |    | KM032219 | France: Reunion Island, W Indian Ocean        | <i>Ostreopsis</i> sp. 8 |
| P-0127       |    | KM032214 | France: Reunion Island, W Indian Ocean        | <i>Ostreopsis</i> sp. 8 |
| CAWD184      |    | AB674914 | Cook islands                                  | <i>Ostreopsis</i> sp. 3 |
| TB38OS       |    | AB841216 | Thailand:Phang-Nga, Khao Lak                  | <i>Ostreopsis</i> sp. 7 |
| TB34OS       |    | AB841214 | Thailand:Phang-Nga, Khao Lak                  | <i>Ostreopsis</i> sp. 7 |
| CBA C1019    |    | LN875552 | Cyprus, Aegean Sea, Mediterranean             | <i>O. fattorussoi</i>   |
| VGO881       |    | FM244637 | Spain:East Atlantic, Canary Island, Lanzarote | <i>O. fattorussoi</i>   |

|           |          |                                   |                       |
|-----------|----------|-----------------------------------|-----------------------|
| CBA C1005 | LT220222 | Cyprus, Aegean Sea, Mediterranean | <i>O. fattorussoi</i> |
| CBA C1012 | LN875554 | Cyprus, Aegean Sea, Mediterranean | <i>O. fattorussoi</i> |
| CBA L1020 | LT220224 | Lebanon, Batroun                  | <i>O. fattorussoi</i> |
| CAWD179   | AB674916 | Australia                         | <i>O. fattorussoi</i> |
| VNPQ218   | MT968510 | Viet Nam                          | <i>O. siamensis</i>   |
| PNA19-6   | MT183168 | Tahiti, French Polynesia          | <i>O. siamensis</i>   |
| TF29OS    | AB841255 | Thailand:Trat, Koh Wai            | <i>O. siamensis</i>   |

---
