# Supplementary material for: First Characterization of Ostreopsis cf. ovata (Dinophyceae) and Detection of Ovatoxins during a Multispecific and Toxic Ostreopsis Bloom on French Atlantic Coast
Source: MDPI journal article supplement (doi:10.3390/md20070461), 2022-07-18
Supplement: s1 [file s1]

**Table S2.** Molecular ion transitions (Q1> Q3) and wavelengths used for the detection of palytoxin and its analogues (ovatoxins, ostreocins, mascarenotoxins)

| Analogues        | Q1 ( <i>m/z</i> )                                                                                                          | Q3 ( <i>m/z</i> ,<br>fragment A) | UV detection<br>$\lambda$ (nm) | References |
|------------------|----------------------------------------------------------------------------------------------------------------------------|----------------------------------|--------------------------------|------------|
| PITX             | 1340.2 [M+2H] <sup>2+</sup><br>1331.2 [M+2H-H <sub>2</sub> O] <sup>2+</sup><br>887.5 [M+3H-H <sub>2</sub> O] <sup>3+</sup> | 327.2                            | 233, 263                       | [31, 93]   |
| 42-OH-PITX       | 1348.2 [M+2H] <sup>2+</sup><br>1339.2 [M+2H-H <sub>2</sub> O] <sup>2+</sup><br>899.7 [M+3H] <sup>3+</sup>                  | 327.2                            | 233, 263                       | [94, 95]   |
| Ovatoxin-a       | 1324.3 [M+2H] <sup>2+</sup><br>1315.2 [M+2H-H <sub>2</sub> O] <sup>2+</sup><br>876.8 [M+3H-H <sub>2</sub> O] <sup>3+</sup> | 327.2                            | 233, 263                       | [31, 40]   |
| Ovatoxin-b       | 1346.3 [M+2H] <sup>2+</sup><br>1337.3 [M+2H-H <sub>2</sub> O] <sup>2+</sup><br>891.5 [M+3H-H <sub>2</sub> O] <sup>3+</sup> | 371.2                            | 233, 263                       | [33, 40]   |
| Ovatoxin-c       | 1354.3 [M+2H] <sup>2+</sup><br>1345.3 [M+2H-H <sub>2</sub> O] <sup>2+</sup><br>896.8 [M+3H-H <sub>2</sub> O] <sup>3+</sup> | 371.2                            | 233, 263                       | [33, 40]   |
| Ovatoxin-d       | 1332.3 [M+2H] <sup>2+</sup><br>1323.2 [M+2H-H <sub>2</sub> O] <sup>2+</sup><br>882.2 [M+3H-H <sub>2</sub> O] <sup>3+</sup> | 327.2                            | 233, 263                       | [33, 40]   |
| Ovatoxin-e       | 1332.3 [M+2H] <sup>2+</sup><br>1323.2 [M+2H-H <sub>2</sub> O] <sup>2+</sup><br>882.2 [M+3H-H <sub>2</sub> O] <sup>3+</sup> | 343.2                            | 233, 263                       | [33, 40]   |
| Ovatoxin-f       | 1338.3 [M+2H] <sup>2+</sup><br>1329.3 [M+2H-H <sub>2</sub> O] <sup>2+</sup><br>886.2 [M+3H-H <sub>2</sub> O] <sup>3+</sup> | 327.2                            | 233, 263                       | [34, 40]   |
| Ovatoxin-g       | 1316.3 [M+2H] <sup>2+</sup><br>1307.2 [M+2H-H <sub>2</sub> O] <sup>2+</sup><br>871.5 [M+3H-H <sub>2</sub> O] <sup>3+</sup> | 327.2                            | 233, 263                       | [35]       |
| Ovatoxin-h       | 1317.3 [M+2H] <sup>2+</sup><br>1308.3 [M+2H-H <sub>2</sub> O] <sup>2+</sup><br>872.2 [M+3H-H <sub>2</sub> O] <sup>3+</sup> | 327.2                            | 233, 263                       | [36]       |
| Ovatoxin-i       | 1345.3 [M+2H] <sup>2+</sup><br>1336.3 [M+2H-H <sub>2</sub> O] <sup>2+</sup><br>890.8 [M+3H-H <sub>2</sub> O] <sup>3+</sup> | 327.2                            | 233, 263                       | [40]       |
| Ovatoxin-j1/j2   | 1353.3 [M+2H] <sup>2+</sup><br>1344.3 [M+2H-H <sub>2</sub> O] <sup>2+</sup><br>896.2 [M+3H-H <sub>2</sub> O] <sup>3+</sup> | 327.2                            | 233, 263                       | [40]       |
| Ovatoxin-k       | 1361.3 [M+2H] <sup>2+</sup><br>1352.2 [M+2H-H <sub>2</sub> O] <sup>2+</sup><br>901.5 [M+3H-H <sub>2</sub> O] <sup>3+</sup> | 327.2                            | 233, 263                       | [40]       |
| Ostreocin-D      | 1329.2 [M+H+Na] <sup>2+</sup><br>1318.2 [M+2H] <sup>2+</sup><br>893.3 [M+H+2Na] <sup>3+</sup>                              | 313.2                            | 233, 263                       | [44]       |
| Ostreocin-B      | 1337.2 [M+H+Na] <sup>2+</sup><br>1326.2 [M+2H] <sup>2+</sup><br>898.7 [M+H+2Na] <sup>3+</sup>                              | 313.2                            | 233, 263                       | [47, 80]   |
| Ostreocin-A      | 1337.2 [M+H+Na] <sup>2+</sup><br>1326.2 [M+2H] <sup>2+</sup><br>898.7 [M+H+2Na] <sup>3+</sup>                              | 313.2                            | 233, 263                       | [46]       |
| Ostreocin-E1     | 1320.2 [M+H+Na] <sup>2+</sup><br>1309.2 [M+2H] <sup>2+</sup><br>887.3 [M+H+2Na] <sup>3+</sup>                              | 313.2                            | 233, 263                       | [46]       |
| Mascarenotoxin-A | 1295.5<br>836.9<br>606.3                                                                                                   | 327.2                            | 233, 263                       | [96, 97]   |
| Mascarenotoxin-B | 1304.3<br>864.9<br>836.2                                                                                                   | 327.2                            | 233, 263                       | [96]       |
| Mascarenotoxin-C | 1326.3 [M+H+Na] <sup>2+</sup><br>1315.3 [M+2H] <sup>2+</sup><br>877 [M+3H] <sup>3+</sup>                                   | 327.2                            | 233, 263                       | [97]       |
