# Supplementary material for: First Characterization of Ostreopsis cf. ovata (Dinophyceae) and Detection of Ovatoxins during a Multispecific and Toxic Ostreopsis Bloom on French Atlantic Coast
Source: MDPI journal article supplement (doi:10.3390/md20070461), 2022-07-18
Supplement: s1 [file s1]

**Table S3.** Summary of samples collected for the different analyses

| Samples collected |           |       |                                                        | Type of analysis |               |        |                  |
|-------------------|-----------|-------|--------------------------------------------------------|------------------|---------------|--------|------------------|
| Site              | Date      | water | macroalga                                              | Cell counts      | Molecular id. | Toxins | Strain isolation |
| Hendaye           | 18-Sep-20 | -     | <i>Cystoseira tamariscifolia</i> .                     | +                | -             | -      | -                |
| Erromardie        | 03-Aug-21 | +     | <i>Gelidium corneum</i>                                | +                | -             | -      | -                |
| Erromardie        | 09-Aug-21 | +     | <i>Gelidium corneum</i> ,<br><i>Halopithys incurva</i> | +                | -             | -      | -                |
| Erromardie        | 16-Aug-21 | +     | -                                                      | +                | +             | +      | -                |
| Erromardie        | 24-Aug-21 | +     | <i>Gelidium corneum</i>                                | +                | -             | -      | -                |
| Erromardie        | 01-Sep-21 | +     | -                                                      | +                | -             | -      | -                |
| Erromardie        | 07-Sep-21 | +     | <i>Gelidium corneum</i>                                | +                | -             | -      | +                |
| Erromardie        | 20-Sep-21 | +     | <i>Gelidium corneum</i>                                | +                | -             | -      | -                |
| Viviers Basques   | 09-Aug-21 | +     | <i>Gelidium corneum</i>                                | +                | -             | -      | -                |
| Viviers Basques   | 24-Aug-21 | +     | <i>Gelidium corneum</i>                                | +                | -             | -      | -                |
| Viviers Basques   | 07-Sep-21 | +     | <i>Gelidium corneum</i>                                | +                | -             | -      | -                |
| Viviers Basques   | 20-Sep-21 | +     | <i>Pterocladia capillacea</i>                          | +                | -             | -      | -                |
| Parlementia       | 09-Aug-21 | +     | <i>Gelidium corneum</i>                                | +                | -             | -      | -                |
| Parlementia       | 24-Aug-21 | +     | <i>Gelidium corneum</i>                                | +                | -             | -      | -                |
| Parlementia       | 07-Aug-21 | +     | <i>Gelidium corneum</i>                                | +                | -             | -      | -                |
| Parlementia       | 20-Aug-21 | +     | <i>Gelidium corneum</i>                                | +                | -             | -      | -                |
